Correction

## Correction: The effects of *pprI* gene of *Deinococcus radiodurans* R1 on acute radiation injury of mice exposed to $^{60}\text{Co}$ $\gamma$ -ray radiation

Ting-Ting Chen<sup>1,\*</sup>, Wei Hua<sup>1,\*</sup>, Xi-Zhi Zhang<sup>1</sup>, Bu-Hai Wang<sup>1</sup> and Zhan-Shan Yang<sup>2</sup>

<sup>1</sup>Department of Oncology, The People`s Hospital of Subei, Yangzhou, China

<sup>2</sup>School of Radiation Medicine and Protection, Medical College of Soochow University, Suzhou, China

\*These authors have contributed equally to this work

**Published:**

**Copyright:** © 2021 Chen et al. This is an open access article distributed under the terms of the [Creative Commons Attribution License](#) (CC BY 3.0), which permits unrestricted use, distribution, and reproduction in any medium, provided the original author and source are credited.

**This article has been corrected:** The picture of ‘GAPDH’ in Figure 1 is an accidental duplicate of the ‘Rad51’ picture in Figure 5A. The corrected Figure 1, produced from the original data, is shown below. The authors declare that these corrections do not change the results or conclusions of this paper.

Original article: Oncotarget. 2017; 8:2008–2019. <https://doi.org/10.18632/oncotarget.13893>

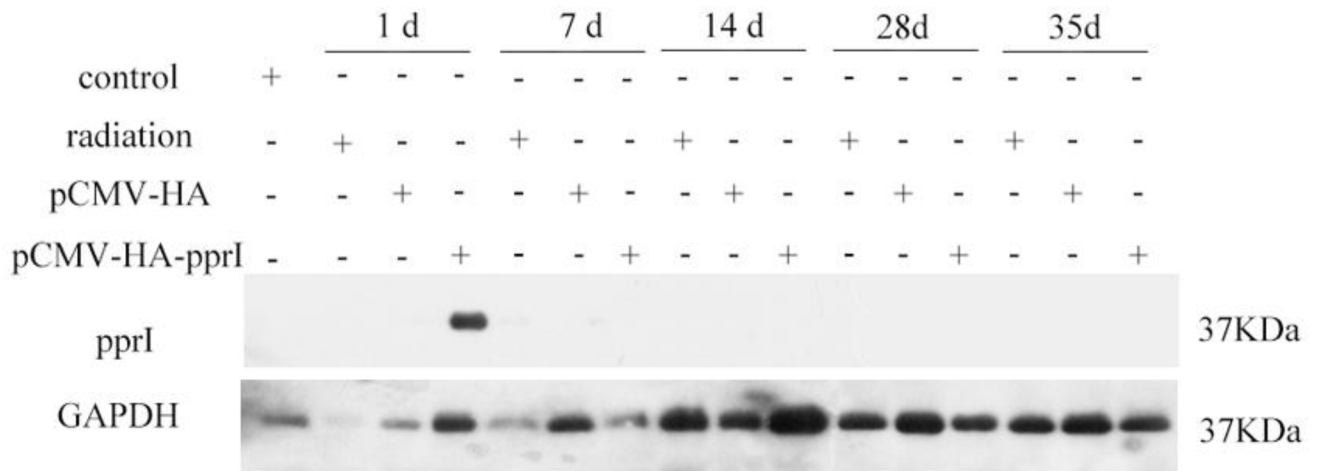

**Figure 1: The expression of PprI in the muscle of mice in control group, radiation group, pCMV-HA transfection group, or pCMV-HA-*pprI* transfection group at different amounts of time after radiation. GAPDH was used as a loading control.**
